# Supplementary material
Source: MDPI journal article supplement (https://www.mdpi.com/2571-6255/1/3/46)
Supplement: s1 [file s1]

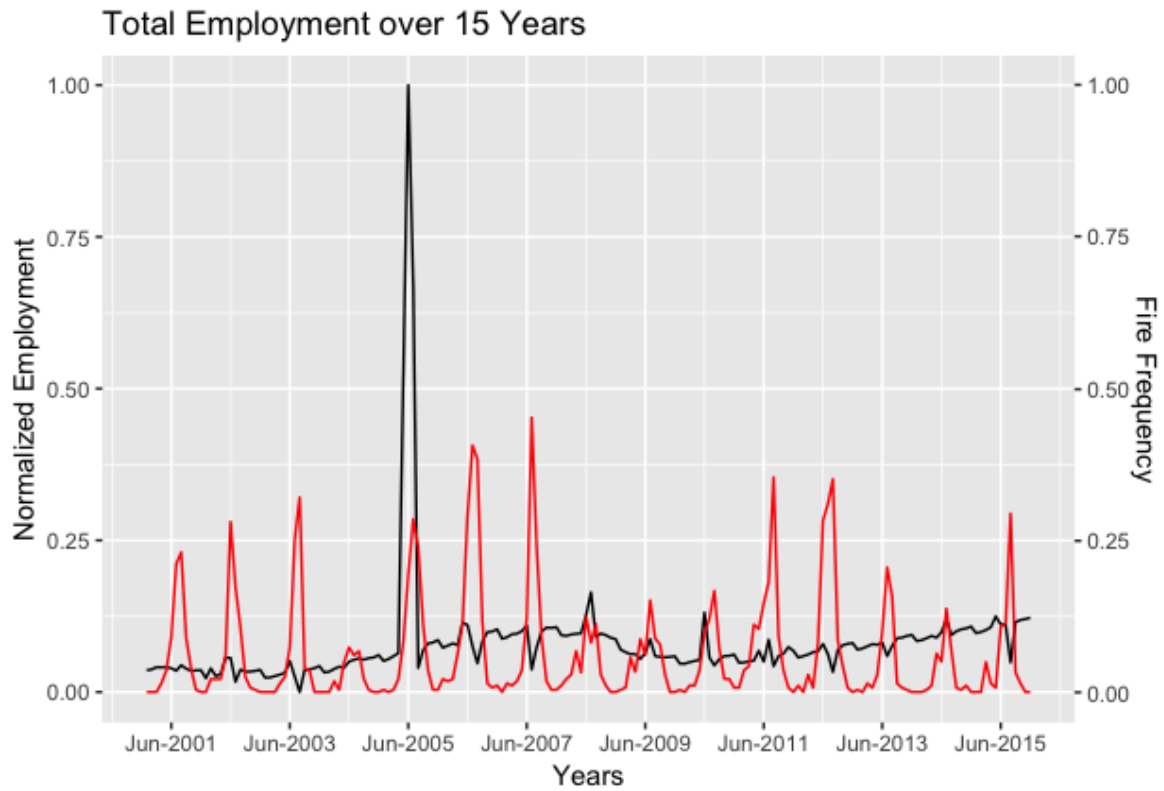

**Figure S1.** Normalized Total employment and fire frequency for the IMW from 2001–2015.

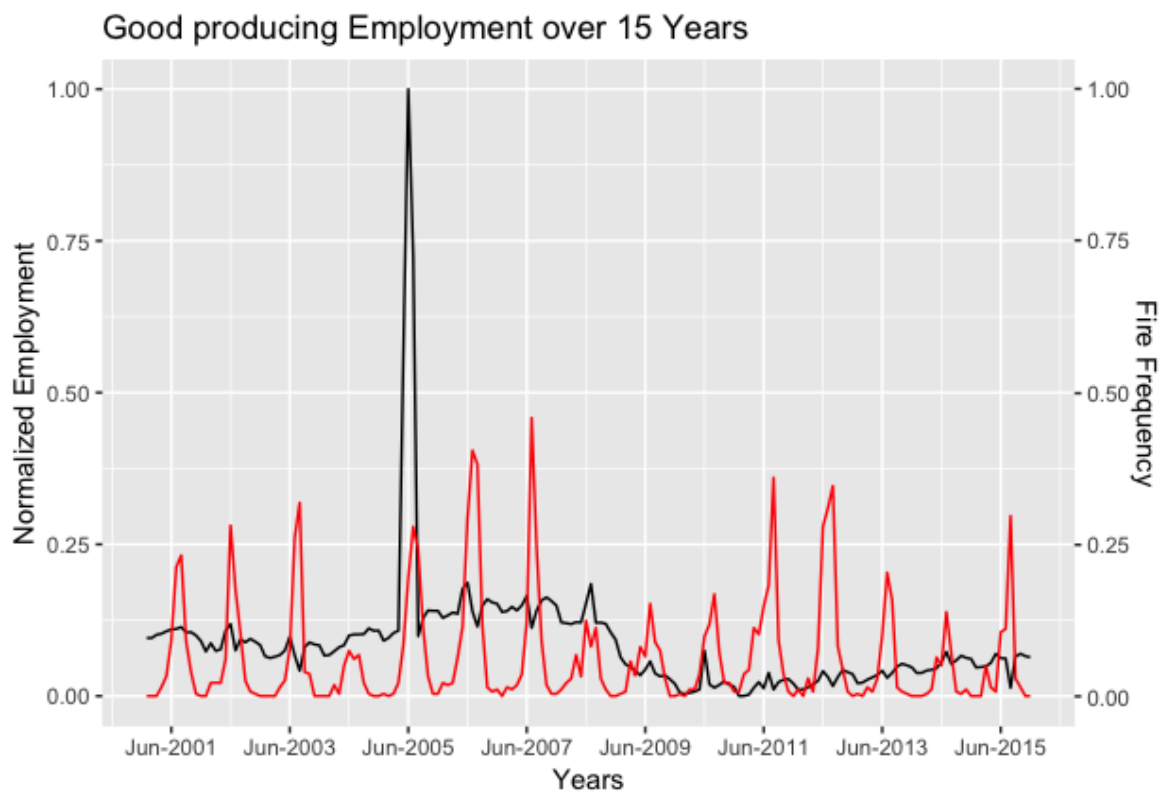

**Figure S2.** Normalized Goods-Producing employment and fire frequency for the IMW from 2001–2015.

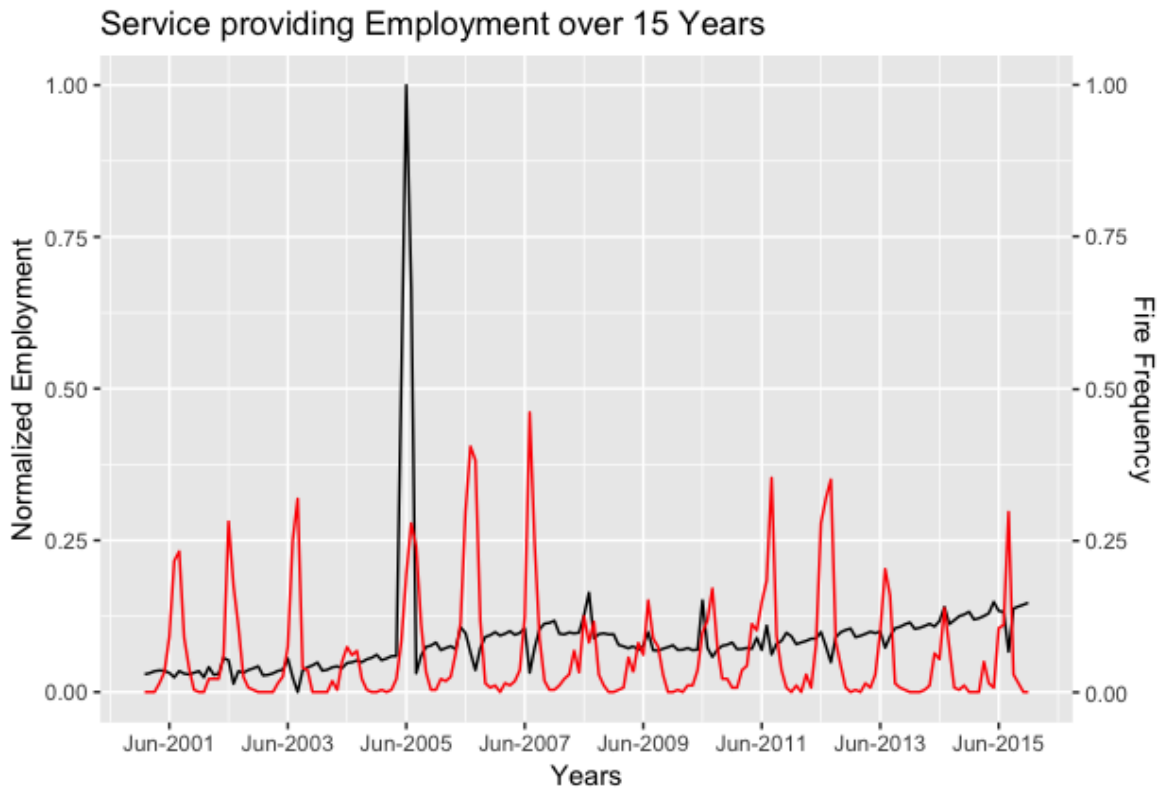

**Figure S3.** Normalized Service-Providing employment and fire frequency for the IMW from 2001–2015.

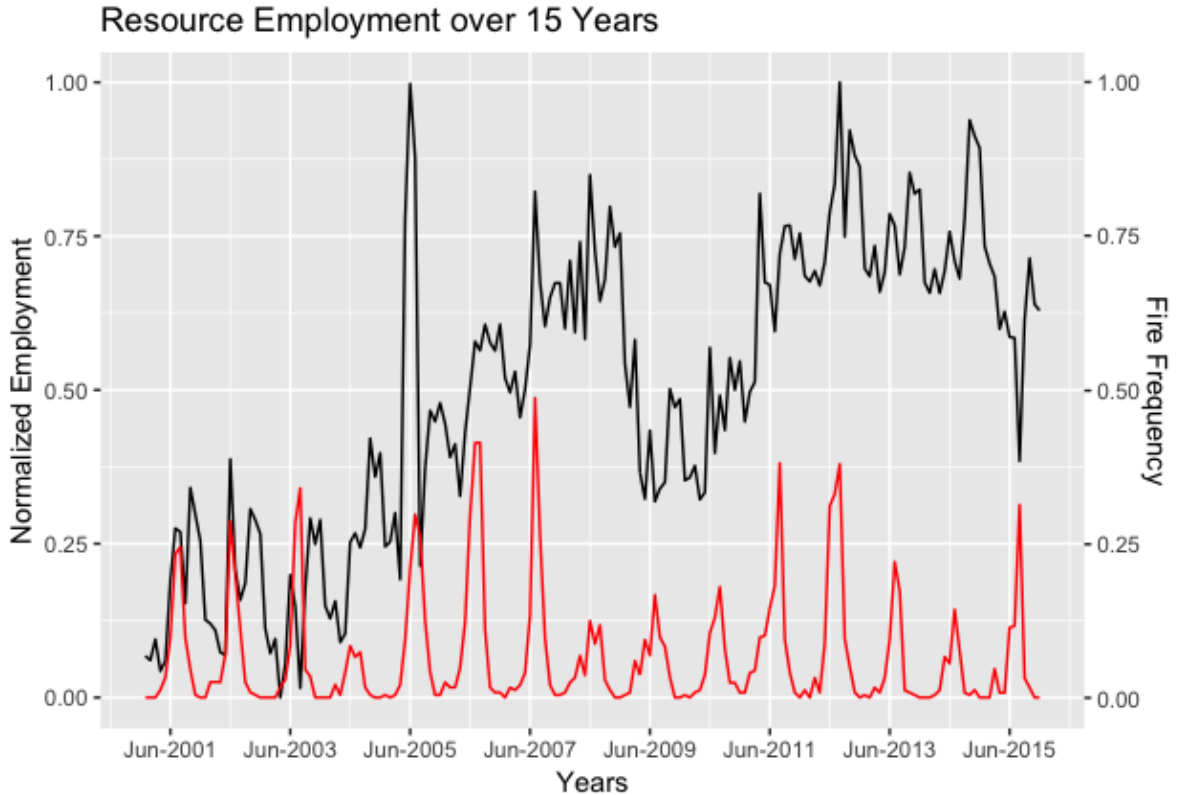

**Figure S4.** Normalized Natural Resource and Mining employment and fire frequency for the IMW from 2001–2015.

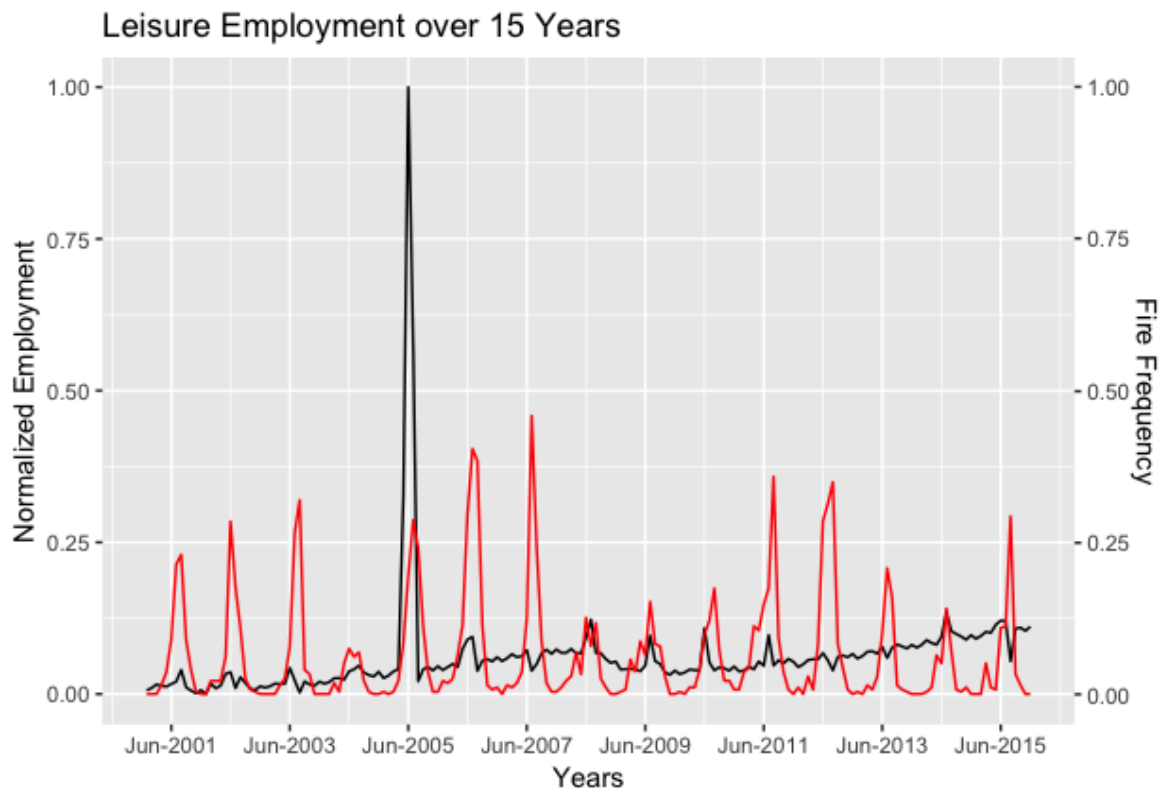

**Figure S5.** Normalized Leisure and Hospitality employment and fire frequency for the IMW from 2001–2015.

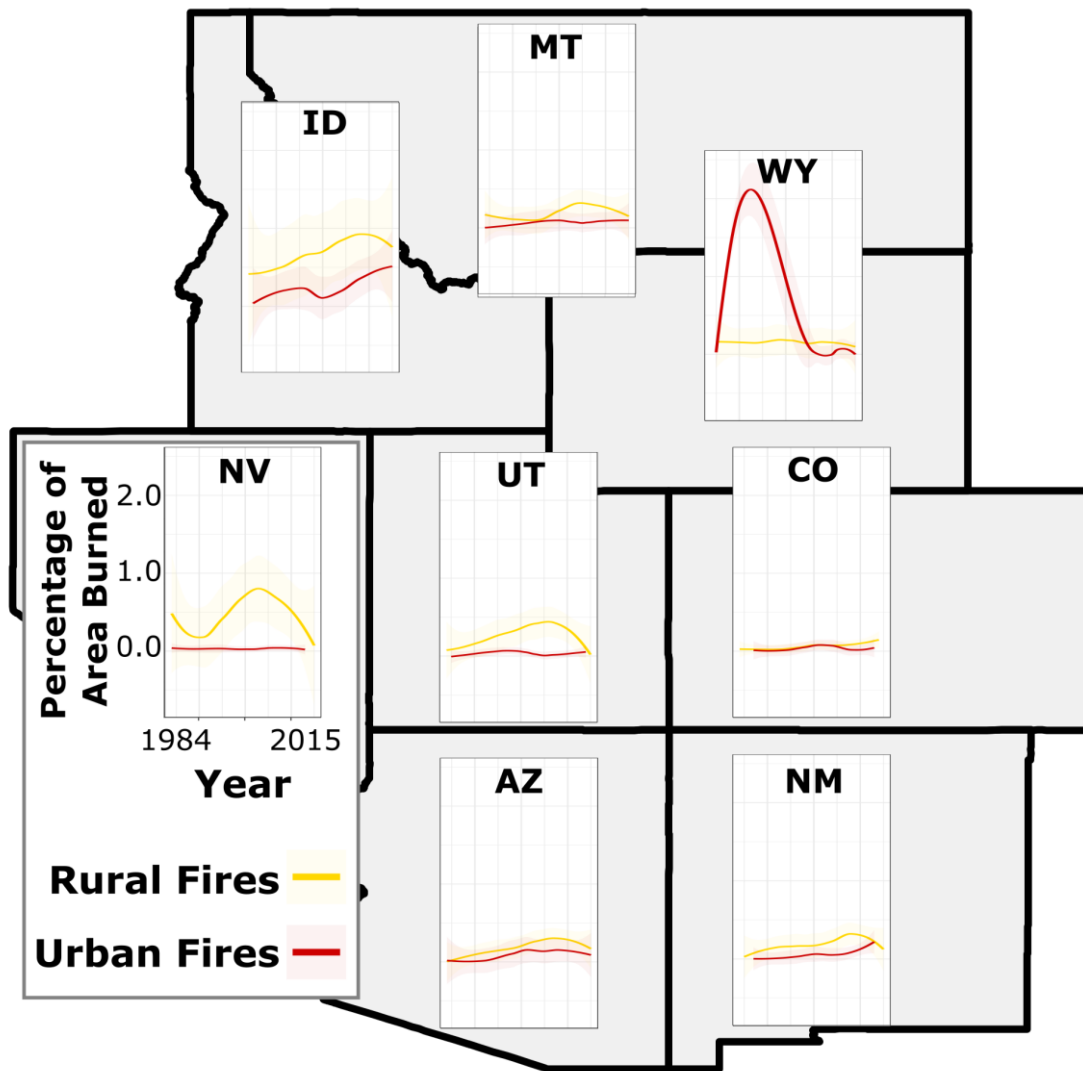

Figure S6. State-level LOESS curves in percentage of area burned for rural and urban fires.

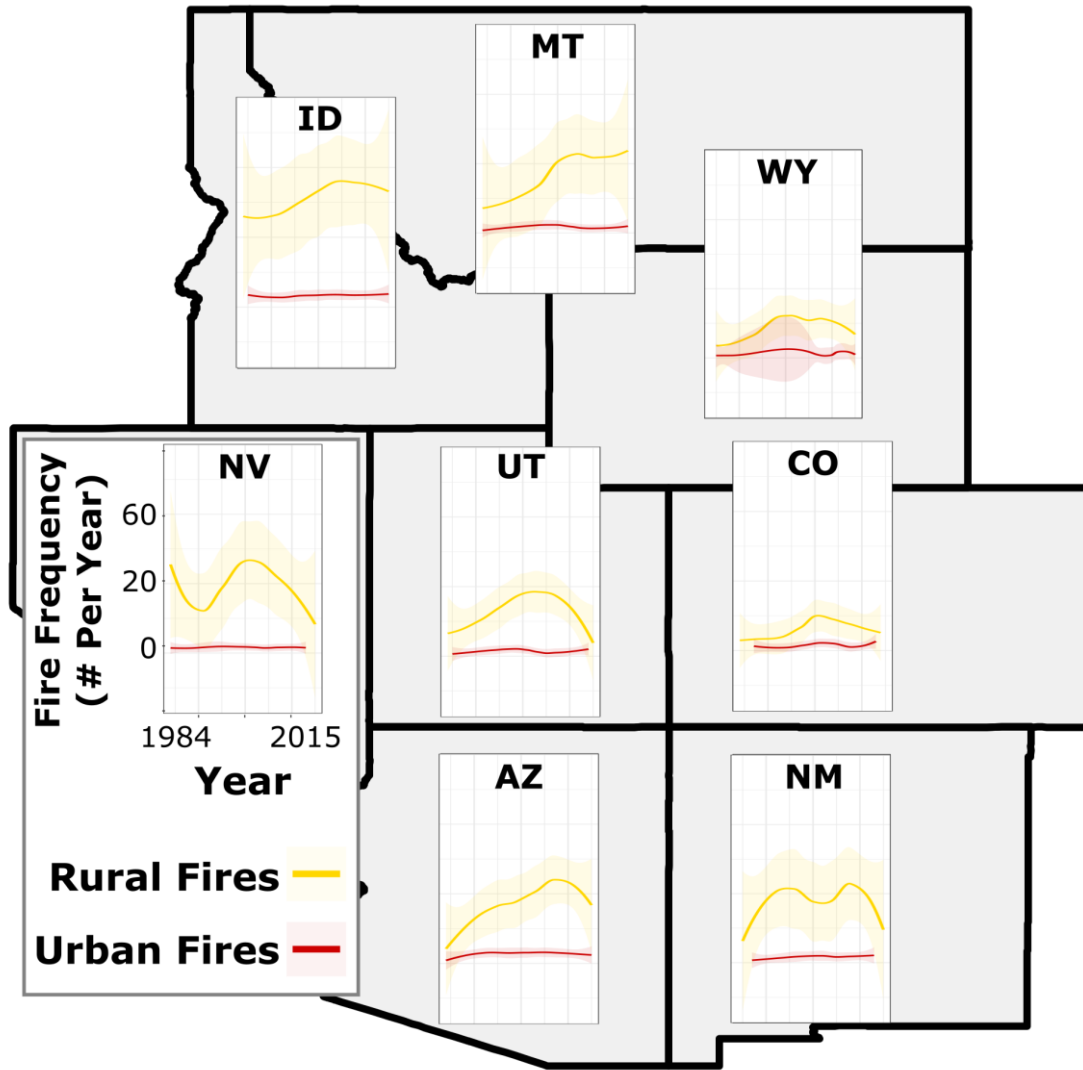

Figure S7. State-level LOESS curves in fire frequency for rural and urban fires.

**Table S1.** Regression results for (I) Total Employment for the 12-month window post-fire for years 2001-2015 (\*p<0.1; \*\*p<0.05; \*\*\*p<0.01). The first column presents the results for All Fires within all 281 IMW counties (44,666 observations), the second column represents the results for Rural Fires (44,360 observations), the third column represents the results for Urban Fires (41,429 observations), and the last column represents the results for the 14 Increasing Focal Counties (2,274 observations). Effects of fires on employment are presented in percentages. The standard error for each regression is presented in parentheses.

|                         | <b>Dependent variable</b>          |             |             |                           |
|-------------------------|------------------------------------|-------------|-------------|---------------------------|
|                         | Effects of Fires on Employment (%) |             |             |                           |
|                         | All Fires                          | Rural Fires | Urban Fires | Increasing Focal Counties |
| Fire Happened           | 0.005*                             | 0.005       | -0.001      | 0.020***                  |
|                         | (0.003)                            | (0.003)     | (0.008)     | (0.007)                   |
| 1 Months After          | 0.005**                            | 0.006**     | -0.006      | 0.010                     |
|                         | (0.003)                            | (0.003)     | (0.007)     | (0.006)                   |
| 2 Months After          | 0.005**                            | 0.005*      | -0.001      | 0.010                     |
|                         | (0.003)                            | (0.003)     | (0.007)     | (0.006)                   |
| 3 Months After          | 0.004                              | 0.004       | 0.0003      | 0.002                     |
|                         | (0.003)                            | (0.003)     | (0.007)     | (0.006)                   |
| 4 Months After          | 0.005*                             | 0.004       | 0.002       | 0.002                     |
|                         | (0.003)                            | (0.003)     | (0.007)     | (0.007)                   |
| 5 Months After          | 0.002                              | 0.002       | 0.005       | -0.005                    |
|                         | (0.003)                            | (0.003)     | (0.007)     | (0.007)                   |
| 6 Months After          | 0.001                              | 0.001       | 0.006       | 0.0002                    |
|                         | (0.003)                            | (0.003)     | (0.007)     | (0.006)                   |
| 7 Months After          | 0.001                              | 0.001       | 0.003       | -0.0003                   |
|                         | (0.003)                            | (0.003)     | (0.007)     | (0.007)                   |
| 8 Months After          | 0.003                              | 0.003       | 0.006       | 0.0001                    |
|                         | (0.003)                            | (0.003)     | (0.007)     | (0.007)                   |
| 9 Months After          | 0.002                              | 0.002       | 0.003       | 0.005                     |
|                         | (0.003)                            | (0.003)     | (0.007)     | (0.007)                   |
| 10 Months After         | 0.002                              | 0.003       | 0.0004      | -0.002                    |
|                         | (0.003)                            | (0.003)     | (0.007)     | (0.007)                   |
| 11 Months After         | 0.001                              | 0.003       | -0.005      | -0.003                    |
|                         | (0.003)                            | (0.003)     | (0.007)     | (0.007)                   |
| 12 Months After         | 0.003                              | 0.004       | -0.004      | 0.008                     |
|                         | (0.003)                            | (0.003)     | (0.007)     | (0.007)                   |
| Observations            | 44,666                             | 44,360      | 41,429      | 2,274                     |
| R <sup>2</sup>          | 0.996                              | 0.996       | 0.996       | 0.996                     |
| Adjusted R <sup>2</sup> | 0.996                              | 0.996       | 0.996       | 0.996                     |
| Residual Std. Error     | 0.115                              | 0.115       | 0.116       | 0.100                     |
|                         | [df=44,333]                        | [df=44,027] | [df=41,097] | [df=2,208]                |

**Table S2.** Regression results of the (1) Goods Producing sector for the 12-month window post-fire for years 2001-2015 (\*p<0.1; \*\*p<0.05; \*\*\*p<0.01). Effects of fires on employment are presented in percentages. The standard error for each regression is presented in parentheses.

|                         | <b>Dependent variable</b>                 |                    |                     |                           |
|-------------------------|-------------------------------------------|--------------------|---------------------|---------------------------|
|                         | <b>Effects of Fires on Employment (%)</b> |                    |                     |                           |
|                         | All Fires                                 | Rural Fires        | Urban Fires         | Increasing Focal Counties |
| Fire Happened           | 0.007<br>(0.006)                          | 0.009<br>(0.006)   | 0.003<br>(0.015)    | 0.032***<br>(0.012)       |
| 1 Months After          | 0.010**<br>(0.005)                        | 0.011**<br>(0.005) | -0.00004<br>(0.014) | 0.010<br>(0.010)          |
| 2 Months After          | 0.007<br>(0.005)                          | 0.008<br>(0.005)   | 0.002<br>(0.014)    | 0.013<br>(0.011)          |
| 3 Months After          | 0.004<br>(0.005)                          | 0.005<br>(0.005)   | 0.004<br>(0.014)    | 0.012<br>(0.011)          |
| 4 Months After          | 0.007<br>(0.005)                          | 0.008<br>(0.005)   | 0.008<br>(0.014)    | 0.015<br>(0.011)          |
| 5 Months After          | 0.005<br>(0.005)                          | 0.006<br>(0.005)   | 0.009<br>(0.014)    | 0.003<br>(0.011)          |
| 6 Months After          | 0.005<br>(0.005)                          | 0.005<br>(0.005)   | 0.005<br>(0.014)    | -0.0002<br>(0.011)        |
| 7 Months After          | 0.002<br>(0.005)                          | 0.003<br>(0.005)   | -0.004<br>(0.014)   | -0.003<br>(0.011)         |
| 8 Months After          | 0.005<br>(0.005)                          | 0.005<br>(0.006)   | 0.006<br>(0.014)    | -0.008<br>(0.011)         |
| 9 Months After          | 0.004<br>(0.005)                          | 0.005<br>(0.006)   | 0.003<br>(0.014)    | 0.011<br>(0.011)          |
| 10 Months After         | 0.007<br>(0.005)                          | 0.007<br>(0.006)   | 0.007<br>(0.014)    | 0.013<br>(0.011)          |
| 11 Months After         | 0.007<br>(0.005)                          | 0.008<br>(0.006)   | 0.005<br>(0.014)    | 0.008<br>(0.011)          |
| 12 Months After         | 0.009*<br>(0.005)                         | 0.010*<br>(0.006)  | 0.004<br>(0.014)    | 0.018*<br>(0.011)         |
| Observations            | 44,165                                    | 43,877             | 40,966              | 2,209                     |
| R <sup>2</sup>          | 0.984                                     | 0.984              | 0.984               | 0.977                     |
| Adjusted R <sup>2</sup> | 0.984                                     | 0.984              | 0.984               | 0.977                     |
| Residual Std. Error     | 0.222                                     | 0.223              | 0.224               | 0.166                     |
|                         | [df=43,832]                               | [df=43,544]        | [df=40,635]         | [df=2,143]                |

**Table S3.** Regression results of the (2) Service Providing sector for the 12-month window post-fire for years 2001-2015 (\*p<0.1; \*\*p<0.05; \*\*\*p<0.01). Effects of fires on employment are presented in percentages. The standard error for each regression is presented in parentheses.

|                         | <b>Dependent variable</b>          |                    |                   |                           |
|-------------------------|------------------------------------|--------------------|-------------------|---------------------------|
|                         | Effects of Fires on Employment (%) |                    |                   |                           |
|                         | All Fires                          | Rural Fires        | Urban Fires       | Increasing Focal Counties |
| Fire Happened           | 0.002<br>(0.003)                   | 0.003<br>(0.003)   | -0.004<br>(0.008) | -0.002<br>(0.007)         |
| 1 Months After          | 0.004*<br>(0.003)                  | 0.005*<br>(0.003)  | -0.009<br>(0.007) | 0.008<br>(0.006)          |
| 2 Months After          | 0.004<br>(0.003)                   | 0.005<br>(0.003)   | -0.006<br>(0.007) | 0.003<br>(0.006)          |
| 3 Months After          | 0.002<br>(0.003)                   | 0.004<br>(0.003)   | -0.004<br>(0.007) | -0.002<br>(0.006)         |
| 4 Months After          | 0.002<br>(0.003)                   | 0.002<br>(0.003)   | -0.002<br>(0.007) | 0.00003<br>(0.006)        |
| 5 Months After          | -0.0004<br>(0.003)                 | -0.0002<br>(0.003) | 0.001<br>(0.007)  | -0.008<br>(0.006)         |
| 6 Months After          | -0.001<br>(0.003)                  | -0.002<br>(0.003)  | 0.003<br>(0.007)  | -0.003<br>(0.006)         |
| 7 Months After          | 0.001<br>(0.003)                   | 0.001<br>(0.003)   | 0.003<br>(0.008)  | 0.0002<br>(0.006)         |
| 8 Months After          | 0.002<br>(0.003)                   | 0.001<br>(0.003)   | 0.003<br>(0.008)  | -0.001<br>(0.006)         |
| 9 Months After          | 0.003<br>(0.003)                   | 0.002<br>(0.003)   | 0.003<br>(0.008)  | 0.002<br>(0.006)          |
| 10 Months After         | 0.0002<br>(0.003)                  | 0.001<br>(0.003)   | -0.001<br>(0.008) | -0.005<br>(0.006)         |
| 11 Months After         | 0.0002<br>(0.003)                  | 0.001<br>(0.003)   | -0.007<br>(0.008) | -0.006<br>(0.006)         |
| 12 Months After         | 0.001<br>(0.003)                   | 0.001<br>(0.003)   | -0.007<br>(0.008) | -0.004<br>(0.006)         |
| Observations            | 44,177                             | 43,873             | 40,955            | 2,248                     |
| R <sup>2</sup>          | 0.996                              | 0.996              | 0.996             | 0.997                     |
| Adjusted R <sup>2</sup> | 0.996                              | 0.996              | 0.996             | 0.997                     |
| Residual Std. Error     | 0.116                              | 0.115              | 0.117             | 0.095                     |
|                         | [df=43,844]                        | [df=43,540]        | [df=40,623]       | [df=2,182]                |



**Table S4.** Regression results of the (1a) Good Producing: Natural Resource and Mining sector for the 12-month window post-fire for years 2001-2015 (\*p<0.1; \*\*p<0.05; \*\*\*p<0.01). Effects of fires on employment are presented in percentages. The standard error for each regression is presented in parentheses.

|                         | <b>Dependent variable</b>          |                    |                   |                           |
|-------------------------|------------------------------------|--------------------|-------------------|---------------------------|
|                         | Effects of Fires on Employment (%) |                    |                   |                           |
|                         | All Fires                          | Rural Fires        | Urban Fires       | Increasing Focal Counties |
| Fire Happened           | 0.006<br>(0.008)                   | 0.004<br>(0.008)   | -0.006<br>(0.021) | 0.072***<br>(0.019)       |
| 1 Months After          | -0.002<br>(0.007)                  | 0.001<br>(0.007)   | -0.011<br>(0.020) | -0.007<br>(0.016)         |
| 2 Months After          | -0.001<br>(0.007)                  | -0.0004<br>(0.008) | -0.011<br>(0.020) | 0.012<br>(0.016)          |
| 3 Months After          | -0.003<br>(0.007)                  | -0.004<br>(0.008)  | -0.015<br>(0.020) | 0.003<br>(0.017)          |
| 4 Months After          | 0.004<br>(0.007)                   | 0.003<br>(0.008)   | -0.024<br>(0.020) | 0.014<br>(0.017)          |
| 5 Months After          | 0.002<br>(0.007)                   | 0.002<br>(0.008)   | -0.022<br>(0.020) | 0.006<br>(0.017)          |
| 6 Months After          | -0.001<br>(0.007)                  | 0.002<br>(0.008)   | -0.023<br>(0.020) | -0.018<br>(0.017)         |
| 7 Months After          | -0.009<br>(0.007)                  | -0.007<br>(0.008)  | -0.032<br>(0.020) | -0.026<br>(0.017)         |
| 8 Months After          | -0.003<br>(0.007)                  | -0.003<br>(0.008)  | -0.021<br>(0.020) | -0.011<br>(0.017)         |
| 9 Months After          | -0.004<br>(0.007)                  | -0.007<br>(0.008)  | -0.022<br>(0.020) | 0.006<br>(0.017)          |
| 10 Months After         | 0.001<br>(0.008)                   | -0.003<br>(0.008)  | -0.014<br>(0.020) | 0.020<br>(0.017)          |
| 11 Months After         | 0.001<br>(0.008)                   | 0.002<br>(0.008)   | -0.007<br>(0.020) | 0.003<br>(0.017)          |
| 12 Months After         | 0.007<br>(0.008)                   | 0.007<br>(0.008)   | -0.009<br>(0.020) | 0.046***<br>(0.017)       |
| Observations            | 39,406                             | 39,112             | 36,346            | 2,181                     |
| R <sup>2</sup>          | 0.953                              | 0.954              | 0.953             | 0.950                     |
| Adjusted R <sup>2</sup> | 0.952                              | 0.953              | 0.953             | 0.948                     |
| Residual Std. Error     | 0.306                              | 0.304              | 0.305             | 0.252                     |
|                         | [df=39,082]                        | [df=38,788]        | [df=36,023]       | [df=2,116]                |

**Table S5.** Regression results of the (2a) Service Providing: Leisure and Hospitality sector for the 12-month window post-fire for years 2001-2015 (\*p<0.1; \*\*p<0.05; \*\*\*p<0.01). Effects of fires on employment are presented in percentages. The standard error for each regression is presented in parentheses.

|                         | <b>Dependent variable</b>                 |                    |                     |                           |
|-------------------------|-------------------------------------------|--------------------|---------------------|---------------------------|
|                         | <b>Effects of Fires on Employment (%)</b> |                    |                     |                           |
|                         | All Fires                                 | Rural Fires        | Urban Fires         | Increasing Focal Counties |
| Fire Happened           | 0.00002<br>(0.005)                        | 0.001<br>(0.005)   | -0.013<br>(0.013)   | -0.015<br>(0.010)         |
| 1 Months After          | 0.005<br>(0.004)                          | 0.005<br>(0.004)   | -0.031**<br>(0.012) | 0.009<br>(0.008)          |
| 2 Months After          | 0.006<br>(0.005)                          | 0.008<br>(0.005)   | -0.017<br>(0.012)   | -0.005<br>(0.009)         |
| 3 Months After          | 0.003<br>(0.005)                          | 0.003<br>(0.005)   | -0.010<br>(0.012)   | -0.001<br>(0.009)         |
| 4 Months After          | 0.001<br>(0.005)                          | 0.0003<br>(0.005)  | -0.010<br>(0.012)   | -0.006<br>(0.009)         |
| 5 Months After          | 0.0001<br>(0.005)                         | -0.001<br>(0.005)  | 0.0003<br>(0.012)   | -0.015*<br>(0.009)        |
| 6 Months After          | 0.0001<br>(0.005)                         | -0.0004<br>(0.005) | 0.012<br>(0.012)    | -0.003<br>(0.009)         |
| 7 Months After          | 0.001<br>(0.005)                          | 0.001<br>(0.005)   | 0.013<br>(0.013)    | -0.003<br>(0.009)         |
| 8 Months After          | 0.0001<br>(0.005)                         | -0.001<br>(0.005)  | 0.002<br>(0.013)    | -0.001<br>(0.009)         |
| 9 Months After          | 0.0001<br>(0.005)                         | -0.0002<br>(0.005) | 0.003<br>(0.013)    | -0.0005<br>(0.009)        |
| 10 Months After         | -0.006<br>(0.005)                         | -0.006<br>(0.005)  | -0.014<br>(0.013)   | -0.005<br>(0.009)         |
| 11 Months After         | -0.006<br>(0.005)                         | -0.006<br>(0.005)  | -0.024*<br>(0.013)  | -0.010<br>(0.009)         |
| 12 Months After         | -0.002<br>(0.005)                         | -0.002<br>(0.005)  | -0.022*<br>(0.013)  | -0.006<br>(0.009)         |
| Observations            | 43,967                                    | 43,699             | 40,772              | 2,242                     |
| R <sup>2</sup>          | 0.989                                     | 0.989              | 0.989               | 0.994                     |
| Adjusted R <sup>2</sup> | 0.989                                     | 0.989              | 0.988               | 0.994                     |
| Residual Std. Error     | 0.195                                     | 0.194              | 0.195               | 0.136                     |
|                         | [df=43,635]                               | [df=43,367]        | [df=40,441]         | [df=2,176]                |
